# Supplementary material
Source: PubMed Central journal article supplement (PMC4050627)
Supplement: 1323269111_pnas.201323269SI.pdf [file 1323269111_pnas.201323269SI.pdf]

# Supporting Information

Archibald et al. 10.1073/pnas.1323269111

## SI Text

### Data from Collections

California Academy of Sciences collections (CAS)  
Arizona State University, Tempe collections (ASUT)  
J. Romero Nápoles collections  
G. E. Morse collections

### Global Biodiversity Information Facility Data

Occurrence data accessed through the Global Biodiversity Information Facility (GBIF) data portal for the following taxa, published online at [www.gbif.org](http://www.gbif.org) by the institutions listed here below (all accessed December 19, 2012):

#### *Speciomerus giganteus*.

Coleopteran specimens of Iwate Prefectural Museum  
Texas A&M University Insect Collection  
Especímenes INBio

#### *Pachymerus* Species.

Snow Entomological Museum Collection  
Peabody Entomology Distributed Generic Information Retrieval Service  
National Museum of Natural History (NMNH) Entomology Collections  
Royal Belgian Institute of Natural Sciences collections  
Texas A&M University Insect Collection  
Illinois Natural History Survey

#### *Caryobruchus marieae*.

Texas A&M University Insect Collection

#### *Caryobruchus gleditsiae*.

Texas A&M University Insect Collection  
Lund Museum of Zoology–Insect collections

Occurrence data accessed through the GBIF data portal for the following taxa, published online there by the institutions listed (accessed April 17–August 18, 2013):

*Brahea armata* (synonym *Brahea elegans*) and *Brahea brandegeei*:

Missouri Botanical Garden  
Herbario de la Universidad de Arizona  
Herbario del Centro de Investigaciones Biológicas del Noroeste (HCIB)  
Riqueza y distribución de especies  
El complejo *Brahea*–*Erythea* (Palmae)  
NMNH Botany Collections  
University of Arizona (UA) Herbarium  
Actualización de la base de datos del Herbario de la Universidad de Sonora (USON)  
Nationaal Herbarium Nederland  
Fairchild Tropical Botanic Garden

*Phoenix abyssinica*, *Phoenix acaulis*, *Phoenix andamanensis*, *Phoenix caespitosa*, *Phoenix canariensis*, *Phoenix dactylifera*, *Phoenix humilis*, *Phoenix loureiroi*, *Phoenix paludosa*, *Phoenix reclinata*, *Phoenix roebelenii*, and *Phoenix theophrasti*:

Nationaal Herbarium Nederland  
Wildlife Institute of India Herbarium Dataset  
Royal Botanic Gardens, Kew  
Database of the Botany Collection of the Museum of Evolution in Uppsala (UPS)  
Universidad de Barcelona. Grup d'Investigació Geobotànica i Cartografia de vegetació a escala de  
Universidad de Málaga: MGC-Cormof  
Fundación Biodiversidad, Real Jardín  
Jardín Botánico de Córdoba: Herbarium  
Real Jardín Botánico (Madrid), Vascular  
Tercer Inventario Forestal Nacional  
Israel Nature and Parks Authority  
Generalitat Valenciana. Banco de Datos  
Herbario del Jardín Botánico–Histórico  
Sistema de Información de la vegetación  
Hortus Botanicus Sollerensis Herbarium  
The Aarhus University Herbarium Database (AUU)  
Missouri Botanical Garden  
Herbario de la Universidad de Almería  
Royal Botanic Garden Edinburgh Herbarium (E)  
Lund Botanical Museum (LD)

#### *Washingtonia filifera*:

US Department of Agriculture (USDA) PLANTS Database, USDA Natural Resources Conservation Service  
iNaturalist research-grade observations  
CAS Botany (CAS-BOT)  
Consortium of California Herbaria  
UA Herbarium

Occurrence data accessed through Australia's Virtual Herbarium (1) online, and analyzed using the ANUCLIM 6.1 climate surface software (2) for the following taxa (accessed April 14–20, 2013):

#### *Livistona* spp.

Arecaceae (all Australian genera combined, including *Livistona*)  
Additional climate range data were accessed from Thompson et al. (3) for these palm taxa:

#### *Rhapidophyllum hystrix*

#### *Sabal minor*

#### *Serenoa repens*

Climate range data for *Rhopalostylis sapida* is from Reichgelt et al. (4), and for *Trachycarpus fortunei* the range data (minimum and maximum only) was from Walther et al. (5). South American Coccoseae and non-Coccoseae palm climate range data from Kissling et al. (6).

1. Council of Heads of Australasian Herbaria (2013) Australia's Virtual Herbarium. Available at <http://avh.chah.org.au>. Accessed April 20, 2013.

2. Xu T, Hutchinson M (2013) New developments and applications in the ANUCLIM spatial climatic and bioclimatic modelling package. *Environ Model Softw* 40:267–279.

3. Thompson RS, et al. (2012) *Atlas of Relations Between Climatic Parameters and Distributions of Important Trees and Shrubs in North America – Modern Data for Climatic Estimation from Vegetation Inventories* (US Geol Surv, Denver), US Geol Surv Prof Pap 1650–F.

- Reichgelt T, et al. (2013) Quantitative palaeoclimate estimates for Early Miocene southern New Zealand: Evidence from Foulden Maar. *Palaeogeogr Palaeoclimatol Palaeoecol* 378:36–44.
- Walther G-R, et al. (2007) Palms tracking climate change. *Glob Ecol Biogeogr* 16(6): 801–809.

- Kissling WD, et al. (2012) Cenozoic imprints on the phylogenetic structure of palm species assemblages worldwide. *Proc Natl Acad Sci USA* 109(19):7379–7384.

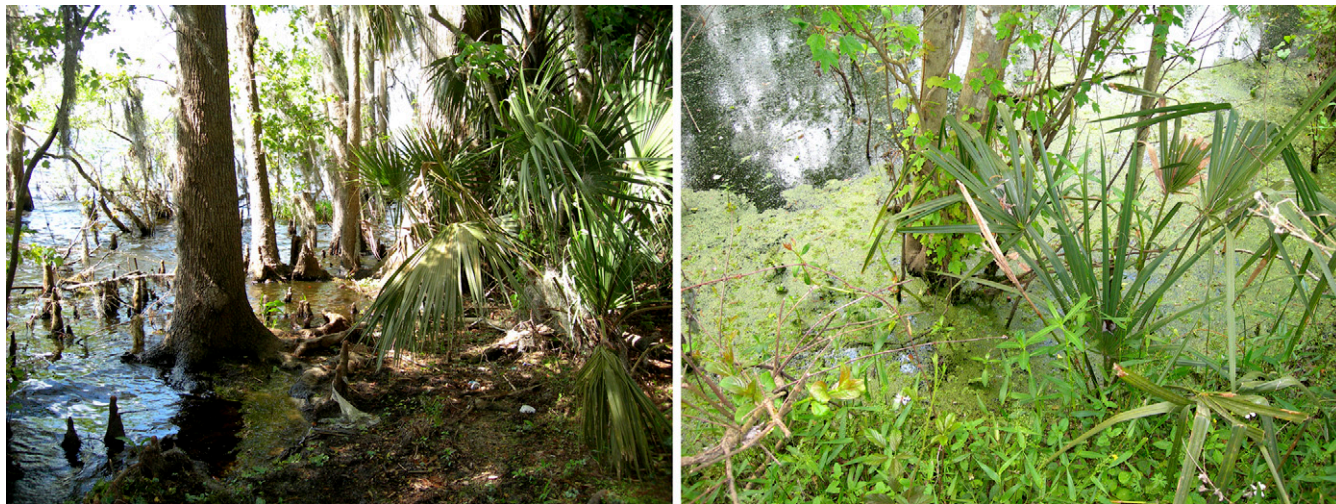

**Fig. S1.** Modern low-statured aquatic palms. *S. repens*, Florida (Left and Right); a low-statured palm closely related to the Eocene palm *Uhlia allenbyensis* in an aquatic setting as modeled for the Princeton Chert (Okanagan Highlands, BC, Canada) by Erwin and Stockey (1).

- Erwin DW, Stockey RA (1991) Silicified monocotyledons from the Middle Eocene Princeton chert (Allenby Formation) of British Columbia, Canada. *Rev Palaeobot Palynol* 70:147–162.











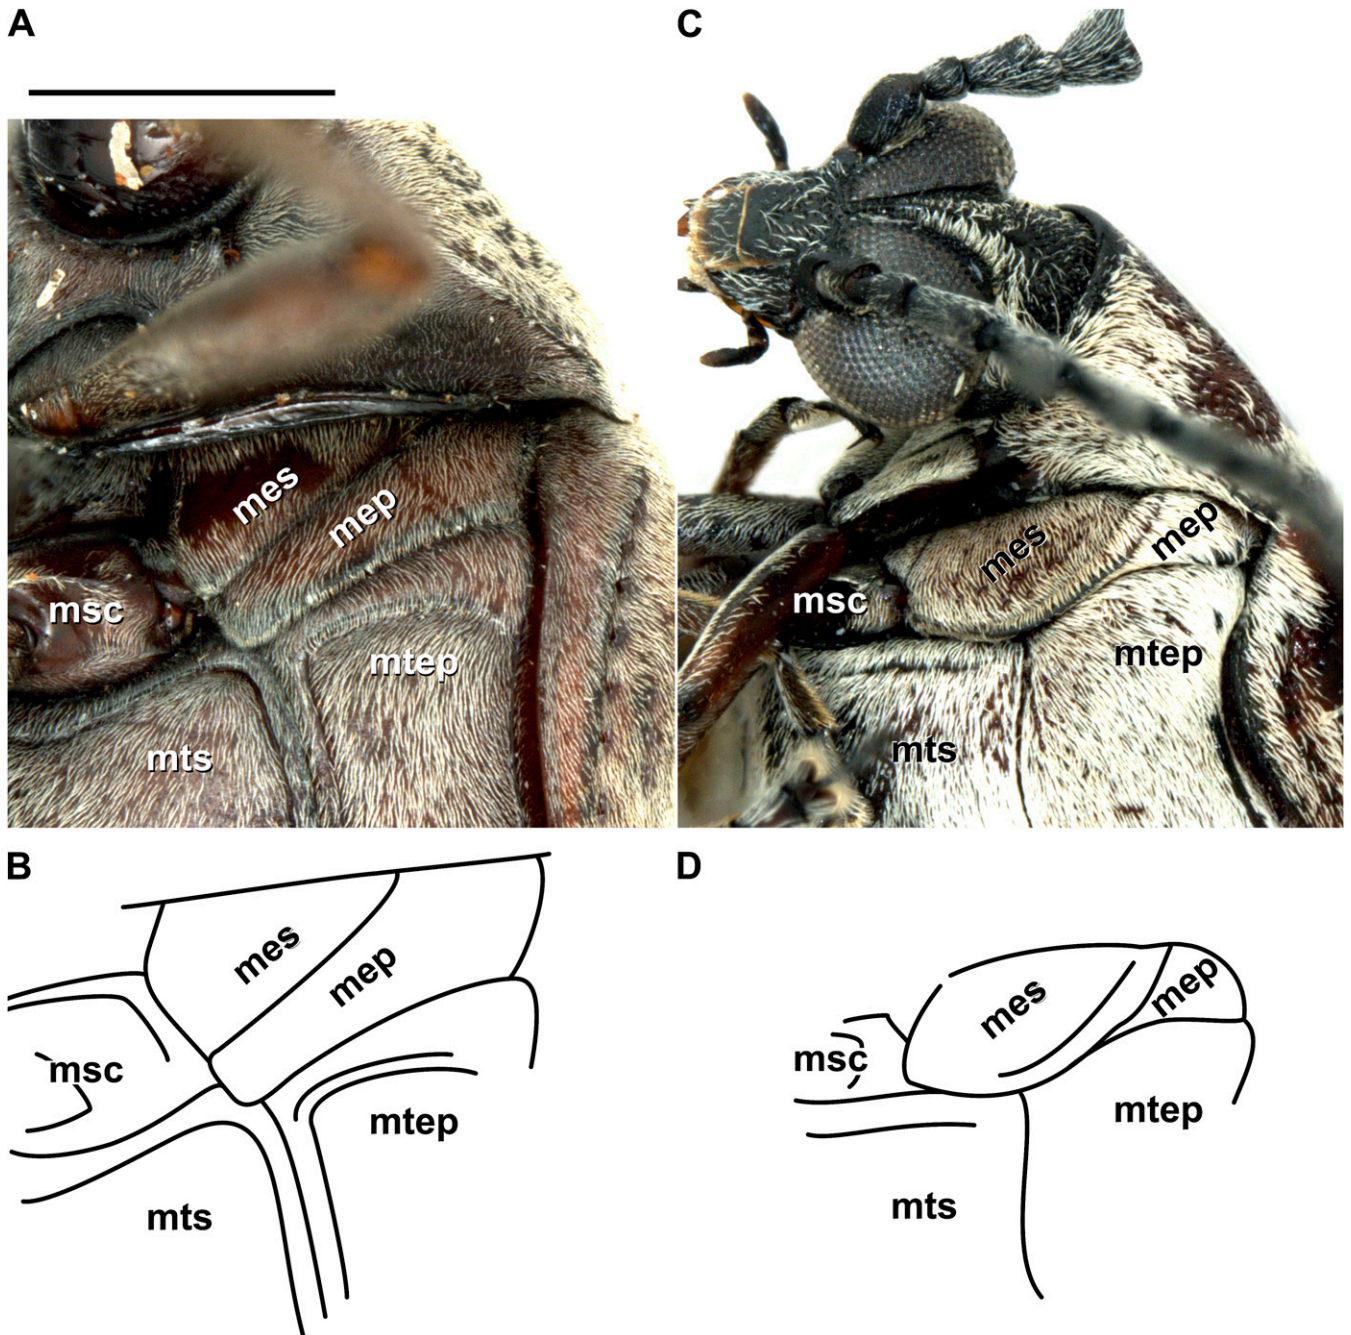

Fig. 54. Pachymerini mesepimeral morphology. Ventrolateral portion of thorax of *C. gleditsiae* (Bruchinae: Pachymerini: Pachymerina) [(A) photograph and (B) drawing] and *Megacerus discoidus* (Bruchinae: Bruchini: Megacerina) [(C) photograph and (D) drawing], showing difference in the size, shape, and location of the mesepimeron and mesopleuron. mep, mesepimeron; mes, mesopleuron; msc, mesocoxal cavity; mtep, metepisternum; mts, metasternum. *C. gleditsiae* shows the plesiomorphic condition of the mesepimeron expanded mesally, connecting broadly with the mesocoxa and/or metasternum, contrasted with the derived state seen in *M. discoidus*, where the mesepimeron narrows and may not reach the mesocoxa and/or metasternum. This mesally expanded mesepimeron is not itself diagnostic of Pachymerini or Pachymerina; it appears in other tribes of Bruchinae (Amblycerini, Eubaptini, and Rhaebini); however, this is only found in the Pachymerini in combination with the incrassate metafemur and metatibia carinate (the incrassate metafemur and metatibia carinate without the mesally expanded mesepimeron occurs convergently in a lineage of Bruchini). (Scale bar: 1 mm, all to scale.)





**Table S1. Pachymerina occurrence MATs**

| Group                                    | Minimum | 25th  | Median | 75th  | Maximum |
|------------------------------------------|---------|-------|--------|-------|---------|
| All Pachymerina                          | 16.74   | 23.13 | 25.04  | 26.39 | 28.43   |
| <i>Caryoborus</i>                        | 16.74   | 24.10 | 25.96  | 26.54 | 27.45   |
| <i>Caryobruchus</i>                      | 18.16   | 22.36 | 24.25  | 25.11 | 26.60   |
| <i>Pachymerus</i>                        | 17.69   | 23.26 | 25.51  | 26.80 | 28.10   |
| <i>Speciomerus</i>                       | 21.48   | 22.91 | 25.10  | 26.37 | 28.43   |
| <i>Caryobruchus</i> + <i>Speciomerus</i> | 18.16   | 22.81 | 24.67  | 25.78 | 28.43   |

MAT values in °C. Data from Table S4.

**Table S2. Pachymerina occurrence winter temperatures**

| Group                                    | Minimum | 25th  | Median | 75th  | Maximum |
|------------------------------------------|---------|-------|--------|-------|---------|
| All Pachymerina                          | 9.70    | 19.40 | 22.90  | 25.65 | 27.87   |
| <i>Caryoborus</i>                        | 16.52   | 22.72 | 25.00  | 25.94 | 26.98   |
| <i>Caryobruchus</i>                      | 12.02   | 16.60 | 20.72  | 22.35 | 25.30   |
| <i>Pachymerus</i>                        | 9.70    | 20.74 | 24.45  | 26.24 | 27.37   |
| <i>Speciomerus</i>                       | 17.17   | 20.88 | 24.24  | 25.60 | 27.87   |
| <i>Caryobruchus</i> + <i>Speciomerus</i> | 12.02   | 17.95 | 21.60  | 23.48 | 27.87   |

CQMT values in °C. Data from Table S4.

**Table S3. Pachymerina occurrence mean annual precipitation**

| Group                                    | Minimum | 25th  | Median | 75th  | Maximum |
|------------------------------------------|---------|-------|--------|-------|---------|
| All Pachymerina                          | 115     | 1,258 | 1,538  | 2,285 | 5,033   |
| <i>Caryoborus</i>                        | 539     | 1,612 | 2,327  | 2,711 | 3,766   |
| <i>Caryobruchus</i>                      | 115     | 941   | 1,275  | 1,437 | 2,777   |
| <i>Pachymerus</i>                        | 150     | 1,267 | 1,717  | 2,168 | 2,855   |
| <i>Speciomerus</i>                       | 1,348   | 1,535 | 1,915  | 2,690 | 5,033   |
| <i>Caryobruchus</i> + <i>Speciomerus</i> | 115     | 1,238 | 1,411  | 1,874 | 5,033   |

Mean annual precipitation (MAP) values in millimeters per year. Data from Table S4.



Table S4. Pachymerina occurrence and climate data used in Tables S1–S3

| Species                        | Country       | Latitude | Longitude | MAT   | CQMT  | MAP   | Source                                        |
|--------------------------------|---------------|----------|-----------|-------|-------|-------|-----------------------------------------------|
| <i>Caryoborus chiriquensis</i> | Ecuador       | −0.4356  | −78.9656  | 16.74 | 16.52 | 2,341 | 1                                             |
| <i>Caryoborus chiriquensis</i> | Ecuador       | −0.2542  | −79.1725  | 23.13 | 22.53 | 2,706 | 1                                             |
| <i>Caryoborus chiriquensis</i> | Honduras      | 15.5333  | −86.8000  | 18.93 | 16.62 | 1,650 | 2                                             |
| <i>Caryoborus chiriquensis</i> | Panama        | 9.3494   | −79.9044  | 26.74 | 26.10 | 3,256 | 3                                             |
| <i>Caryoborus gracilis</i>     | Bolivia       | −11.3175 | −66.5789  | 26.30 | 25.00 | 1,599 | 1                                             |
| <i>Caryoborus gracilis</i>     | Bolivia       | −17.8000 | −63.1667  | 23.95 | 20.63 | 1,244 | 1                                             |
| <i>Caryoborus gracilis</i>     | Brazil        | 4.7167   | −60.0167  | 23.78 | 23.40 | 1,261 | 1                                             |
| <i>Caryoborus gracilis</i>     | Brazil        | −10.6667 | −62.3000  | 24.20 | 23.57 | 1,923 | 1                                             |
| <i>Caryoborus gracilis</i>     | Colombia      | 4.1014   | −73.5647  | 25.85 | 25.00 | 3,568 | 1                                             |
| <i>Caryoborus gracilis</i>     | Ecuador       | −0.2542  | −79.1725  | 23.13 | 22.53 | 2,706 | 1                                             |
| <i>Caryoborus gracilis</i>     | French Guiana | 4.8167   | −53.2667  | 25.23 | 24.63 | 2,664 | 1                                             |
| <i>Caryoborus gracilis</i>     | Peru          | −11.2542 | −74.6367  | 23.53 | 22.67 | 1,754 | 1                                             |
| <i>Caryoborus gracilis</i>     | Peru          | −4.9081  | −73.6667  | 26.83 | 26.25 | 2,632 | 4                                             |
| <i>Caryoborus gracilis</i>     | Peru          | −3.9167  | −73.7500  | 26.39 | 25.80 | 2,712 | 4                                             |
| <i>Caryoborus gracilis</i>     | Peru          | −3.4000  | −72.7500  | 26.23 | 25.58 | 2,873 | 4                                             |
| <i>Caryoborus gracilis</i>     | Peru          | −4.9167  | −73.6667  | 26.83 | 26.25 | 2,632 | 4                                             |
| <i>Caryoborus gracilis</i>     | Venezuela     | 9.7500   | −63.1831  | 26.95 | 26.05 | 1,294 | 1                                             |
| <i>Caryoborus serripes</i>     | Bolivia       | −11.1172 | −66.1239  | 26.52 | 25.32 | 1,651 | 1                                             |
| <i>Caryoborus serripes</i>     | Brazil        | −3.1033  | −60.0114  | 27.45 | 26.98 | 2,153 | 1                                             |
| <i>Caryoborus serripes</i>     | Brazil        | −14.7864 | −39.2728  | 24.33 | 22.88 | 1,445 | 5                                             |
| <i>Caryoborus serripes</i>     | Brazil        | −18.5833 | −39.7500  | 24.07 | 22.02 | 1,307 | 5                                             |
| <i>Caryoborus serripes</i>     | Brazil        | −19.3936 | −40.0581  | 24.27 | 22.08 | 1,203 | 1                                             |
| <i>Caryoborus serripes</i>     | Brazil        | −4.2614  | −55.9719  | 27.35 | 26.77 | 2,137 | 1                                             |
| <i>Caryoborus serripes</i>     | Brazil        | −2.4333  | −54.7000  | 26.07 | 25.45 | 2,154 | 1                                             |
| <i>Caryoborus serripes</i>     | Brazil        | −22.8750 | −43.2775  | 23.02 | 20.52 | 1,256 | 1                                             |
| <i>Caryoborus serripes</i>     | Brazil        | −5.9833  | −35.9333  | 25.09 | 23.42 | 539   | 1                                             |
| <i>Caryoborus serripes</i>     | French Guiana | 4.9389   | −52.3206  | 26.54 | 25.97 | 3,021 | 1                                             |
| <i>Caryoborus serripes</i>     | French Guiana | 4.5742   | −52.2261  | 25.19 | 24.68 | 3,766 | 1                                             |
| <i>Caryoborus serripes</i>     | French Guiana | 4.8167   | −53.2667  | 25.23 | 24.63 | 2,664 | 1                                             |
| <i>Caryoborus serripes</i>     | Guyana        | 5.2617   | −59.1483  | 26.45 | 25.65 | 2,853 | 1                                             |
| <i>Caryoborus serripes</i>     | Peru          | −4.9081  | −73.6667  | 26.83 | 26.25 | 2,632 | 4                                             |
| <i>Caryoborus serripes</i>     | Peru          | −4.0536  | −73.1700  | 26.43 | 25.87 | 2,716 | 1                                             |
| <i>Caryoborus serripes</i>     | Peru          | −3.9167  | −73.7500  | 26.39 | 25.80 | 2,712 | 4                                             |
| <i>Caryoborus serripes</i>     | Peru          | −3.4000  | −72.7500  | 26.23 | 25.58 | 2,873 | 4                                             |
| <i>Caryoborus serripes</i>     | Peru          | −6.0333  | −76.9667  | 22.99 | 22.33 | 1,392 | 4                                             |
| <i>Caryoborus serripes</i>     | Peru          | −4.9167  | −73.6667  | 26.83 | 26.25 | 2,632 | 4                                             |
| <i>Caryoborus serripes</i>     | Peru          | −12.6333 | −69.2000  | 25.51 | 23.93 | 2,245 | 4                                             |
| <i>Caryoborus serripes</i>     | Suriname      | 4.7711   | −55.0494  | 26.78 | 26.03 | 2,313 | 1                                             |
| <i>Caryobruchus curvipes</i>   | Guatemala     | 16.9833  | −89.8333  | 25.55 | 22.95 | 1,511 | 1                                             |
| <i>Caryobruchus curvipes</i>   | Guatemala     | 17.3936  | −89.6336  | 25.78 | 22.90 | 1,240 | 1                                             |
| <i>Caryobruchus curvipes</i>   | Mexico        | 17.4489  | −91.9614  | 25.39 | 22.78 | 2,563 | J. Romero Nápoles collections<br>(this paper) |
| <i>Caryobruchus curvipes</i>   | Mexico        | 16.7500  | −93.1000  | 23.75 | 21.60 | 912   | 1                                             |
| <i>Caryobruchus curvipes</i>   | Mexico        | 17.2752  | −95.0542  | 25.14 | 22.20 | 2,579 | G. E. Morse collections<br>(this paper)       |
| <i>Caryobruchus curvipes</i>   | Mexico        | 18.2372  | −96.4047  | 25.20 | 21.85 | 2,732 | 1                                             |
| <i>Caryobruchus curvipes</i>   | Mexico        | 23.1028  | −106.0203 | 24.75 | 20.77 | 834   | 1                                             |
| <i>Caryobruchus gleditsiae</i> | Bermuda       | 32.3475  | −64.6633  | 21.64 | 17.28 | 1,513 | 1                                             |
| <i>Caryobruchus gleditsiae</i> | Cuba          | 21.5497  | −77.9717  | 25.10 | 22.32 | 1,403 | 1                                             |
| <i>Caryobruchus gleditsiae</i> | Cuba          | 21.3808  | −77.9169  | 25.19 | 22.45 | 1,414 | 1                                             |
| <i>Caryobruchus gleditsiae</i> | Cuba          | 23.1319  | −82.3642  | 25.04 | 22.22 | 1,238 | 1                                             |
| <i>Caryobruchus gleditsiae</i> | Cuba          | 23.1239  | −82.3003  | 24.85 | 22.00 | 1,289 | 1                                             |
| <i>Caryobruchus gleditsiae</i> | Jamaica       | 17.9183  | −76.1844  | 26.60 | 25.30 | 1,715 | 1                                             |
| <i>Caryobruchus gleditsiae</i> | Mexico        | 22.3403  | −105.2983 | 24.66 | 21.27 | 1,274 | 1                                             |
| <i>Caryobruchus gleditsiae</i> | Mexico        | 22.6578  | −105.6069 | 24.87 | 21.10 | 1,021 | 1                                             |
| <i>Caryobruchus gleditsiae</i> | Mexico        | 27.9333  | −111.0500 | 24.66 | 18.28 | 191   | 1                                             |
| <i>Caryobruchus gleditsiae</i> | Mexico        | 29.5500  | −110.4250 | 22.33 | 15.03 | 460   | ASUT (this paper)                             |
| <i>Caryobruchus gleditsiae</i> | Mexico        | 18.9761  | −96.0775  | 25.91 | 22.65 | 1,538 | 1                                             |
| <i>Caryobruchus gleditsiae</i> | United States | 29.6500  | −82.3167  | 20.43 | 13.30 | 1,322 | 1                                             |
| <i>Caryobruchus gleditsiae</i> | United States | 29.5744  | −82.3474  | 20.60 | 13.50 | 1,337 | G. E. Morse collections<br>(this paper)       |
| <i>Caryobruchus gleditsiae</i> | United States | 27.2928  | −81.3631  | 22.34 | 16.70 | 1,216 | 1                                             |
| <i>Caryobruchus gleditsiae</i> | United States | 26.4328  | −81.8156  | 23.26 | 18.13 | 1,336 | 1                                             |

Table S4. Cont.

| Species                           | Country       | Latitude | Longitude | MAT   | CQMT  | MAP   | Source                                        |
|-----------------------------------|---------------|----------|-----------|-------|-------|-------|-----------------------------------------------|
| <i>Caryobruchus gleditsiae</i>    | United States | 29.1667  | -81.8000  | 20.95 | 14.25 | 1,287 | 1                                             |
| <i>Caryobruchus gleditsiae</i>    | United States | 25.6769  | -80.2719  | 24.13 | 20.00 | 1,295 | 1                                             |
| <i>Caryobruchus gleditsiae</i>    | United States | 25.4475  | -80.4794  | 23.71 | 19.40 | 1,506 | 1                                             |
| <i>Caryobruchus gleditsiae</i>    | United States | 25.4683  | -80.4778  | 23.64 | 19.33 | 1,537 | 1                                             |
| <i>Caryobruchus gleditsiae</i>    | United States | 25.4045  | -80.6925  | 23.67 | 19.30 | 1,394 | G. E. Morse collections<br>(this paper)       |
| <i>Caryobruchus gleditsiae</i>    | United States | 24.7167  | -81.0833  | 24.67 | 20.67 | 1,102 | 1                                             |
| <i>Caryobruchus gleditsiae</i>    | United States | 28.5333  | -81.3667  | 22.03 | 15.87 | 1,258 | 1                                             |
| <i>Caryobruchus gleditsiae</i>    | United States | 27.7456  | -81.5308  | 22.41 | 16.60 | 1,249 | 1                                             |
| <i>Caryobruchus gleditsiae</i>    | United States | 25.9014  | -97.4972  | 23.21 | 16.57 | 687   | 1                                             |
| <i>Caryobruchus gleditsiae</i>    | United States | 26.2000  | -98.2167  | 23.27 | 15.77 | 558   | 1                                             |
| <i>Caryobruchus marieae</i>       | Cuba          | 23.1319  | -82.3642  | 25.04 | 22.22 | 1,238 | 1                                             |
| <i>Caryobruchus maya</i>          | Guatemala     | 17.2250  | -89.6133  | 25.26 | 22.45 | 1,339 | 1                                             |
| <i>Caryobruchus maya</i>          | Mexico        | 18.5339  | -89.6408  | 25.08 | 21.90 | 1,121 | 1                                             |
| <i>Caryobruchus maya</i>          | Mexico        | 18.5169  | -89.3958  | 24.63 | 21.48 | 1,137 | 1                                             |
| <i>Caryobruchus maya</i>          | Mexico        | 18.2453  | -92.8314  | 26.51 | 23.75 | 1,872 | 1                                             |
| <i>Caryobruchus maya</i>          | Mexico        | 19.7997  | -87.4764  | 26.06 | 23.65 | 1,252 | 1                                             |
| <i>Caryobruchus maya</i>          | Mexico        | 19.2153  | -88.1011  | 25.87 | 23.43 | 1,275 | 1                                             |
| <i>Caryobruchus maya</i>          | Mexico        | 18.4861  | -88.8217  | 25.05 | 22.50 | 1,321 | 1                                             |
| <i>Caryobruchus maya</i>          | Mexico        | 18.3817  | -88.5658  | 25.08 | 22.87 | 1,359 | 1                                             |
| <i>Caryobruchus maya</i>          | Mexico        | 20.9947  | -89.6086  | 25.78 | 22.98 | 950   | 1                                             |
| <i>Caryobruchus rubidus</i>       | Mexico        | 16.7500  | -93.1000  | 23.75 | 21.60 | 912   | J. Romero Nápoles collections<br>(this paper) |
| <i>Caryobruchus rubidus</i>       | Mexico        | 17.9824  | -96.1100  | 25.00 | 21.62 | 2,777 | G. E. Morse collections<br>(this paper)       |
| <i>Caryobruchus rubidus</i>       | Mexico        | 18.3650  | -95.7953  | 26.27 | 23.00 | 1,558 | 1                                             |
| <i>Caryobruchus rubidus</i>       | Mexico        | 18.4442  | -95.2133  | 24.37 | 21.27 | 2,157 | 1                                             |
| <i>Caryobruchus veseyi</i>        | Mexico        | 29.7294  | -114.7208 | 18.16 | 13.05 | 115   | 1                                             |
| <i>Caryobruchus veseyi</i>        | Mexico        | 23.7000  | -109.8167 | 21.57 | 16.25 | 378   | 1                                             |
| <i>Pachymerus abruptestriatus</i> | Brazil        | -15.2333 | -39.6167  | 22.17 | 20.43 | 1,067 | 1                                             |
| <i>Pachymerus bactris</i>         | Brazil        | -3.1033  | -60.0114  | 27.45 | 26.98 | 2,153 | 1                                             |
| <i>Pachymerus bactris</i>         | Ecuador       | -2.4581  | -79.2614  | 23.87 | 22.93 | 1,943 | 1                                             |
| <i>Pachymerus bactris</i>         | French Guiana | 5.1597   | -52.6503  | 26.06 | 25.62 | 2,855 | 1                                             |
| <i>Pachymerus bactris</i>         | Panama        | 9.1667   | -79.8333  | 26.58 | 25.80 | 2,682 | 1                                             |
| <i>Pachymerus bactris</i>         | Panama        | 8.9000   | -79.5833  | 26.94 | 26.43 | 1,844 | 1                                             |
| <i>Pachymerus bactris</i>         | Panama        | 8.8064   | -79.5167  | 26.98 | 26.50 | 1,717 | 1                                             |
| <i>Pachymerus bactris</i>         | Venezuela     | 10.2469  | -67.5961  | 24.98 | 24.17 | 932   | 1                                             |
| <i>Pachymerus bactris</i>         | Venezuela     | 10.4000  | -66.9000  | 19.53 | 18.33 | 1,084 | 1                                             |
| <i>Pachymerus bridwelli</i>       | Argentina     | -28.5000 | -59.0500  | 20.80 | 15.52 | 1,063 | 1                                             |
| <i>Pachymerus bridwelli</i>       | Argentina     | -31.3869 | -58.0200  | 18.63 | 12.98 | 1,277 | 1                                             |
| <i>Pachymerus bridwelli</i>       | Argentina     | -32.2667 | -68.4167  | 17.69 | 9.70  | 150   | 1                                             |
| <i>Pachymerus bridwelli</i>       | Argentina     | -25.2833 | -57.7167  | 23.24 | 18.58 | 1,375 | 6                                             |
| <i>Pachymerus bridwelli</i>       | Argentina     | -25.1600 | -58.1464  | 22.66 | 18.10 | 1,124 | 1                                             |
| <i>Pachymerus bridwelli</i>       | Argentina     | -25.7050 | -54.2483  | 20.13 | 15.63 | 1,767 | 1                                             |
| <i>Pachymerus cardo</i>           | Bolivia       | -14.2333 | -63.5167  | 25.50 | 23.72 | 1,458 | 1                                             |
| <i>Pachymerus cardo</i>           | Brazil        | -2.0500  | -59.9000  | 26.84 | 26.45 | 2,802 | 7                                             |
| <i>Pachymerus cardo</i>           | Brazil        | -22.9675 | -43.2239  | 22.53 | 20.08 | 1,401 | 1                                             |
| <i>Pachymerus cardo</i>           | Brazil        | 3.4167   | -61.6667  | 26.69 | 25.95 | 1,760 | 8                                             |
| <i>Pachymerus cardo</i>           | Colombia      | 3.5394   | -76.3036  | 23.93 | 23.58 | 1,026 | 1                                             |
| <i>Pachymerus cardo</i>           | Colombia      | 4.1267   | -76.3706  | 21.36 | 20.98 | 1,463 | 1                                             |
| <i>Pachymerus cardo</i>           | Colombia      | 4.6647   | -76.0486  | 23.28 | 22.82 | 1,332 | 1                                             |
| <i>Pachymerus cardo</i>           | Colombia      | 3.3753   | -76.5336  | 23.98 | 23.48 | 1,307 | G. E. Morse collections<br>(this paper)       |
| <i>Pachymerus cardo</i>           | Costa Rica    | 11.2178  | -85.6125  | 26.31 | 25.38 | 2,149 | 1                                             |
| <i>Pachymerus cardo</i>           | French Guiana | 4.8167   | -53.2667  | 25.23 | 24.63 | 2,664 | 1                                             |
| <i>Pachymerus cardo</i>           | Guyana        | 6.2800   | -57.5753  | 27.16 | 26.77 | 1,156 | 1                                             |
| <i>Pachymerus cardo</i>           | Guyana        | 6.8064   | -58.1453  | 26.85 | 26.42 | 2,335 | 1                                             |
| <i>Pachymerus cardo</i>           | Honduras      | 15.7000  | -86.8500  | 24.35 | 22.23 | 2,121 | 2                                             |
| <i>Pachymerus cardo</i>           | Honduras      | 15.7667  | -87.0000  | 26.46 | 24.45 | 2,569 | 2                                             |
| <i>Pachymerus cardo</i>           | Panama        | 9.1667   | -79.8333  | 26.58 | 25.80 | 2,682 | 1                                             |
| <i>Pachymerus cardo</i>           | Panama        | 9.0000   | -79.7500  | 26.39 | 25.70 | 2,363 | 1                                             |
| <i>Pachymerus cardo</i>           | Panama        | 8.8792   | -79.7822  | 26.77 | 26.23 | 2,003 | 1                                             |



Table S4. Cont.

| Species                                | Country             | Latitude | Longitude | MAT   | CQMT  | MAP   | Source                                  |
|----------------------------------------|---------------------|----------|-----------|-------|-------|-------|-----------------------------------------|
| <i>Pachymerus cardo</i>                | Panama              | 9.0483   | -79.6606  | 26.36 | 25.65 | 2,183 | 1                                       |
| <i>Pachymerus cardo</i>                | Panama              | 9.0833   | -79.6167  | 26.35 | 25.65 | 2,099 | 1                                       |
| <i>Pachymerus cardo</i>                | Panama              | 9.0333   | -79.6333  | 26.35 | 25.70 | 2,190 | 1                                       |
| <i>Pachymerus cardo</i>                | Panama              | 9.0933   | -79.6516  | 25.99 | 25.23 | 2,292 | G. E. Morse collections<br>(this paper) |
| <i>Pachymerus cardo</i>                | Panama              | 9.0618   | -79.6437  | 26.36 | 25.65 | 2,183 | G. E. Morse collections<br>(this paper) |
| <i>Pachymerus cardo</i>                | Peru                | -4.9081  | -73.6667  | 26.83 | 26.25 | 2,632 | 4                                       |
| <i>Pachymerus cardo</i>                | Peru                | -3.9167  | -73.7500  | 26.39 | 25.80 | 2,712 | 4                                       |
| <i>Pachymerus cardo</i>                | Peru                | -4.9167  | -73.6667  | 26.83 | 26.25 | 2,632 | 4                                       |
| <i>Pachymerus cardo</i>                | Peru                | -12.6333 | -69.2000  | 25.51 | 23.93 | 2,245 | 4                                       |
| <i>Pachymerus cardo</i>                | Trinidad and Tobago | 10.6667  | -61.5167  | 25.72 | 24.83 | 1,861 | 1                                       |
| <i>Pachymerus cardo</i>                | Trinidad and Tobago | 10.6636  | -61.5267  | 26.57 | 25.72 | 1,618 | 1                                       |
| <i>Pachymerus cardo</i>                | Venezuela           | 10.2469  | -67.5961  | 24.98 | 24.17 | 932   | 1                                       |
| <i>Pachymerus cardo</i>                | Venezuela           | 8.4258   | -70.6281  | 26.83 | 26.47 | 1,772 | 1                                       |
| <i>Pachymerus cardo</i>                | Venezuela           | 10.1117  | -68.0653  | 24.56 | 24.08 | 1,233 | 1                                       |
| <i>Pachymerus cardo</i>                | Venezuela           | 10.4000  | -66.9000  | 19.53 | 18.33 | 1,084 | 1                                       |
| <i>Pachymerus cardo</i>                | Venezuela           | 8.8041   | -65.2019  | 26.92 | 26.42 | 1,221 | G. E. Morse collections<br>(this paper) |
| <i>Pachymerus cardo</i>                | Venezuela           | 8.9333   | -67.4167  | 27.38 | 26.43 | 1,196 | 1                                       |
| <i>Pachymerus cardo</i>                | Venezuela           | 8.4822   | -72.3317  | 28.10 | 27.30 | 2,285 | 1                                       |
| <i>Pachymerus cardo</i>                | Venezuela           | 9.8753   | -70.9619  | 27.73 | 27.23 | 1,402 | 1                                       |
| <i>Pachymerus nucleorum</i>            | Bolivia             | -17.4500 | -63.6667  | 24.13 | 20.97 | 1,572 | CAS (this paper)                        |
| <i>Pachymerus nucleorum</i>            | Brazil              | -12.9742 | -38.5133  | 25.12 | 23.55 | 1,834 | 1                                       |
| <i>Pachymerus nucleorum</i>            | Brazil              | -21.7000 | -57.8667  | 25.08 | 21.12 | 1,284 | 1                                       |
| <i>Pachymerus nucleorum</i>            | Brazil              | -10.8125 | -50.6189  | 27.39 | 26.43 | 1,812 | CAS (this paper)                        |
| <i>Pachymerus nucleorum</i>            | Paraguay            | -23.4308 | -56.4989  | 22.91 | 19.07 | 1,427 | G. E. Morse collections<br>(this paper) |
| <i>Pachymerus sveni</i>                | Brazil              | -3.1033  | -60.0114  | 27.45 | 26.98 | 2,153 | 1                                       |
| <i>Pachymerus sveni</i>                | Brazil              | -3.9164  | -38.6075  | 25.77 | 25.00 | 1,406 | 1                                       |
| <i>Pachymerus sveni</i>                | Brazil              | -1.4372  | -48.4706  | 26.88 | 26.45 | 2,438 | 1                                       |
| <i>Pachymerus sveni</i>                | Brazil              | -22.8750 | -43.2775  | 23.02 | 20.52 | 1,256 | 1                                       |
| <i>Pachymerus sveni</i>                | Brazil              | -28.4000 | -54.9667  | 20.68 | 15.72 | 1,901 | 1                                       |
| <i>Pachymerus sveni</i>                | Venezuela           | 10.4000  | -66.9000  | 19.53 | 18.33 | 1,084 | 1                                       |
| <i>Pachymerus thoracicus</i>           | Paraguay            | -25.2833 | -57.6333  | 23.30 | 18.67 | 1,403 | 6                                       |
| <i>Pachymerus</i> undetermined species | Paraguay            | -25.5100 | -57.5600  | 22.87 | 18.23 | 1,388 | G. E. Morse collections<br>(this paper) |
| <i>Pachymerus</i> undetermined species | Paraguay            | -23.3442 | -57.0442  | 23.46 | 19.30 | 1,348 | G. E. Morse collections<br>(this paper) |
| <i>Speciomerus giganteus</i>           | Brazil              | -17.8872 | -51.7181  | 23.52 | 21.70 | 1,535 | 1                                       |
| <i>Speciomerus giganteus</i>           | Brazil              | -2.9381  | -51.8617  | 26.65 | 26.20 | 2,067 | 1                                       |
| <i>Speciomerus giganteus</i>           | Colombia            | 8.9833   | -73.9667  | 28.43 | 27.87 | 2,086 | 1                                       |
| <i>Speciomerus giganteus</i>           | Costa Rica          | 10.0631  | -84.7700  | 26.81 | 25.92 | 1,872 | 1                                       |
| <i>Speciomerus giganteus</i>           | Panama              | 9.1667   | -79.8333  | 26.58 | 25.80 | 2,682 | 1                                       |
| <i>Speciomerus giganteus</i>           | Panama              | 9.3728   | -79.8811  | 26.74 | 26.10 | 3,256 | CAS (this paper)                        |
| <i>Speciomerus giganteus</i>           | Panama              | 9.1317   | -79.7769  | 26.41 | 25.57 | 2,497 | 1                                       |
| <i>Speciomerus giganteus</i>           | Paraguay            | -25.5333 | -57.0500  | 21.48 | 17.17 | 1,453 | G. E. Morse collections<br>(this paper) |
| <i>Speciomerus giganteus</i>           | Paraguay            | -23.4308 | -56.4989  | 22.91 | 19.07 | 1,427 | G. E. Morse collections<br>(this paper) |
| <i>Speciomerus giganteus</i>           | Peru                | -3.9167  | -73.7500  | 26.39 | 25.80 | 2,712 | 4                                       |
| <i>Speciomerus giganteus</i>           | Peru                | -4.9167  | -73.6667  | 26.83 | 26.25 | 2,632 | 4                                       |
| <i>Speciomerus revoili</i>             | Paraguay            | -24.1500 | -55.7000  | 22.57 | 18.47 | 1,550 | G. E. Morse collections<br>(this paper) |
| <i>Speciomerus revoili</i>             | Paraguay            | -25.5333 | -57.0500  | 21.48 | 17.17 | 1,453 | G. E. Morse collections<br>(this paper) |
| <i>Speciomerus rubrofemoralis</i>      | Brazil              | -17.8872 | -51.7181  | 23.52 | 21.70 | 1,535 | 1                                       |
| <i>Speciomerus rubrofemoralis</i>      | Brazil              | -15.4333 | -55.7500  | 22.87 | 20.88 | 1,548 | 1                                       |
| <i>Speciomerus rubrofemoralis</i>      | Brazil              | -16.4681 | -54.6414  | 24.93 | 22.35 | 1,523 | 1                                       |
| <i>Speciomerus ruficornis</i>          | Brazil              | -2.8333  | -55.1333  | 26.15 | 25.68 | 1,957 | 1                                       |
| <i>Speciomerus ruficornis</i>          | Brazil              | -15.4333 | -55.7500  | 22.87 | 20.88 | 1,548 | 1                                       |
| <i>Speciomerus ruficornis</i>          | Brazil              | -12.7667 | -55.6000  | 24.95 | 23.63 | 1,852 | 1                                       |

Table S4. Cont.

| Species                                 | Country            | Latitude | Longitude | MAT   | CQMT  | MAP   | Source                               |
|-----------------------------------------|--------------------|----------|-----------|-------|-------|-------|--------------------------------------|
| <i>Speciomerus ruficornis</i>           | Paraguay           | -23.4308 | -56.4989  | 22.91 | 19.07 | 1,427 | G. E. Morse collections (this paper) |
| <i>Speciomerus</i> undetermined species | Paraguay           | -25.3500 | -57.5167  | 22.63 | 18.10 | 1,408 | G. E. Morse collections (this paper) |
| <i>Speciomerus</i> undetermined species | Paraguay           | -23.3442 | -57.0442  | 23.46 | 19.30 | 1,348 | G. E. Morse collections (this paper) |
| <i>Caryobruchus gleditsiae</i>          | Dominican Republic | 18.8300  | -69.8000  | 25.89 | 24.10 | 1,946 | 1                                    |
| <i>Caryobruchus gleditsiae</i>          | Mexico             | 21.9100  | -99.3000  | 22.40 | 17.48 | 1,339 | GBIF                                 |
| <i>Caryobruchus gleditsiae</i>          | Mexico             | 22.3600  | -105.0000 | 23.62 | 20.22 | 1,304 | GBIF                                 |
| <i>Caryobruchus gleditsiae</i>          | United States      | 25.8500  | -97.4000  | 23.19 | 16.60 | 687   | GBIF                                 |
| <i>Caryobruchus gleditsiae</i>          | United States      | 26.3300  | -98.2000  | 23.08 | 15.48 | 584   | GBIF                                 |
| <i>Caryobruchus gleditsiae</i>          | United States      | 28.4300  | -99.7000  | 21.93 | 13.00 | 555   | GBIF                                 |
| <i>Caryobruchus gleditsiae</i>          | United States      | 28.8800  | -97.9000  | 20.97 | 12.30 | 739   | GBIF                                 |
| <i>Caryobruchus gleditsiae</i>          | United States      | 29.4200  | -98.4000  | 20.65 | 12.02 | 697   | GBIF                                 |
| <i>Caryobruchus gleditsiae</i>          | United States      | 29.4500  | -98.5000  | 20.70 | 12.03 | 688   | GBIF                                 |
| <i>Caryobruchus gleditsiae</i>          | United States      | 27.2900  | -81.3000  | 22.37 | 16.72 | 1,220 | GBIF                                 |
| <i>Caryobruchus gleditsiae</i>          | United States      | 28.1200  | -80.6000  | 22.33 | 16.77 | 1,246 | GBIF                                 |
| <i>Caryobruchus marieae</i>             | Colombia           | 4.7400   | -76.1000  | 19.07 | 18.65 | 1,880 | GBIF                                 |
| <i>Pachymerus</i> sp.                   | Brazil             | -3.1100  | -60.0000  | 27.45 | 26.98 | 2,153 | GBIF                                 |
| <i>Pachymerus cardo</i>                 | Brazil             | -19.5000 | -40.6000  | 24.32 | 22.20 | 1,170 | GBIF                                 |
| <i>Pachymerus cardo</i>                 | Colombia           | 3.5390   | -76.3000  | 23.93 | 23.58 | 1,026 | GBIF                                 |
| <i>Pachymerus cardo</i>                 | Colombia           | 4.1260   | -76.3000  | 22.88 | 22.45 | 1,236 | GBIF                                 |
| <i>Pachymerus cardo</i>                 | Colombia           | 4.7400   | -76.1000  | 19.07 | 18.65 | 1,880 | GBIF                                 |
| <i>Pachymerus cardo</i>                 | Venezuela          | 8.1590   | -70.2000  | 27.69 | 27.37 | 1,535 | GBIF                                 |
| <i>Speciomerus giganteus</i>            | Costa Rica         | 10.8364  | -85.6155  | 24.92 | 24.08 | 1,725 | GBIF                                 |
| <i>Speciomerus giganteus</i>            | Costa Rica         | 10.8563  | -85.6119  | 24.92 | 24.08 | 1,725 | GBIF                                 |
| <i>Speciomerus giganteus</i>            | Costa Rica         | 10.9625  | -85.4953  | 21.73 | 20.88 | 2,723 | GBIF                                 |
| <i>Speciomerus giganteus</i>            | Costa Rica         | 10.5848  | -83.5292  | 26.33 | 25.42 | 5,033 | GBIF                                 |
| <i>Speciomerus giganteus</i>            | Costa Rica         | 10.5396  | -83.5065  | 26.25 | 25.35 | 4,701 | GBIF                                 |
| <i>Speciomerus giganteus</i>            | Costa Rica         | 8.7594   | -83.2831  | 26.21 | 25.38 | 4,840 | GBIF                                 |
| <i>Speciomerus giganteus</i>            | Costa Rica         | 9.3877   | -84.1328  | 26.36 | 25.50 | 3,758 | GBIF                                 |
| <i>Speciomerus giganteus</i>            | Costa Rica         | 9.7675   | -84.6081  | 26.31 | 25.47 | 2,587 | GBIF                                 |
| <i>Speciomerus giganteus</i>            | Costa Rica         | 9.7742   | -84.6081  | 26.31 | 25.47 | 2,587 | GBIF                                 |
| <i>Speciomerus giganteus</i>            | Costa Rica         | 8.6791   | -83.5667  | 25.25 | 24.40 | 3,826 | GBIF                                 |

Decimal latitude and longitudes used. Climate analysis performed using DIVA-GIS software with the WorldClim dataset (9, 10).

1. Nilsson JA, Johnson CD (1993) A taxonomic revision of the palm bruchids (Pachymerini) and a description of the world genera of Pachymerinae. *Mem Am Entomol Soc* 41:1-104.
2. Turnbow RH, Cave RD, Kingsolver JM (2003) An annotated checklist of the Bruchidae of Honduras. *Ceiba* 44(2):269-278.
3. Bridwell JC (1929) A preliminary generic arrangement of the palm bruchids and allies (Coleoptera) with descriptions of new species. *Proc Entomol Soc Wash* 31(8):141-160.
4. Delobel A, Couturier G, Kahn F, Nilsson JA (1995) Trophic relationships between palms and bruchids (Coleoptera: Bruchidae: Pachymerini) in Peruvian Amazonia. *Amazoniana* 13(3-4): 209-219.
5. Silva P (1977) Correcoes e aditamentos ao "Quarto catalogo dos insetos que vivem nas plantas do Brasil" (Coleoptera, Bruchidae, Pachymerinae). *Rev Bras Entomol* 21(1):1-5.
6. Prevett PF (1966) A new genus and species of Pachymerinae (Coleoptera: Bruchidae) from South America. *Proc R Entomol Soc Lond* 35(5-6):81-83.
7. Delgado C (2002) The relationship between *Pachymerus cardo* (Fähræus) (Coleoptera: Bruchidae) and the palm *Orbignya spectabilis* (C. martius) Burret (Arecaceae: Cocoeae) in a terra firme forest, Brazilian Amazon. *Amazoniana* 17(1-2):169-171.
8. Silvius KM, Fragoso JMV (2002) Pulp handling by vertebrate seed dispersers increases palm seed predation by bruchid beetles in the northern Amazon. *J Ecol* 90(6):1024-1032.
9. Hijmans RJ, Cameron SE, Parra JL, Jones PG, Jarvis A (2005) Very high resolution interpolated climate surfaces for global land areas. *Int J Climatol* 25(15):1965-1978.
10. Hijmans RJ, et al. (2013) WorldClim - Global Climate Data/DIVA-GIS. Available at [www.worldclim.org](http://www.worldclim.org). Accessed April 2, 2013.
